# Supplementary material for: Waves traveling over a map of visual space can ignite short-term predictions of sensory input
Source: PubMed Central journal article supplement (PMC10256723; doi:10.1038/s41467-023-39076-2), 2023-06-09
Supplement: 41467_2023_39076_MOESM2_ESM.pdf [file 41467_2023_39076_MOESM2_ESM.pdf]

## **Description of Additional Supplementary Files**

File Name: Supplementary Movie 1

Description: Closed-loop forecast of the moving bump. Left: ground-truth frames. Second from left: closed-loop forecast for the network with optimal recurrence. Second from right: network activity for the network with optimal recurrence. Right: closed-loop forecast for the network with no recurrence.

File Name: Supplementary Movie 2

Description: Closed-loop forecast of the natural movie. Left: ground-truth frames. Second from left: closed-loop forecast for the network with optimal recurrence. Second from right: network activity for the network with optimal recurrence. Right: closed-loop forecast for the network with no recurrence.

File Name: Supplementary Movie 3

Description: Closed-loop forecasts of topographic network model (top row) versus topographically shuffled network model (bottom row) in which the recurrent weights and time delays were shuffled.

File Name: Supplementary Movie 4

Description: Forecasts of the movie-switching example. Left: ground-truth frames. Right: forecasts.
